# Supplementary material for: Spicarins A–D from acetylated extract of fungus Spicaria elegans KLA03
Source: Royal Society of Chemistry journal article supplement (doi:10.1039/c5ra01923k), 2015-01-01

## Supporting Information

### Spicarins A-D from Acetylated Extract of Fungus *Spicaria elegans* KLA03

Zhenjian Lin,<sup>ab</sup> Xinhua Ma,<sup>a</sup> Hongjuan Wei<sup>a</sup>, Dehai Li,<sup>a</sup> Qianqun Gu<sup>a</sup> and Tianjiao Zhu<sup>\*a</sup>

<sup>a</sup> Key laboratory of Marine Drugs, Chinese Ministry of Education; Ocean University of China, Qingdao 266003, PR China. Fax: 0086-532-82033054; Tel: 0086-532-82031632; E-mail: zhutj@ouc.edu.cn

<sup>b</sup> Current address: Department of Medicinal Chemistry, L.S. Skaggs Pharmacy Institute, University of Utah, Salt Lake City, UT, USA 84112.

\*To whom correspondence should be addressed. Tel: 0086-532-82031632. Fax: 0086-532-82033054.  
E-mail: zhutj@ouc.edu.cn

**Figure S1. NMR spectra for compound 1**

**Figure S2. NMR spectra for compound 2**

**Figure S3. NMR spectra for compound 3.**

**Figure S4. NMR spectra for compound 4.**

Figure S1. NMR spectra for compound 1

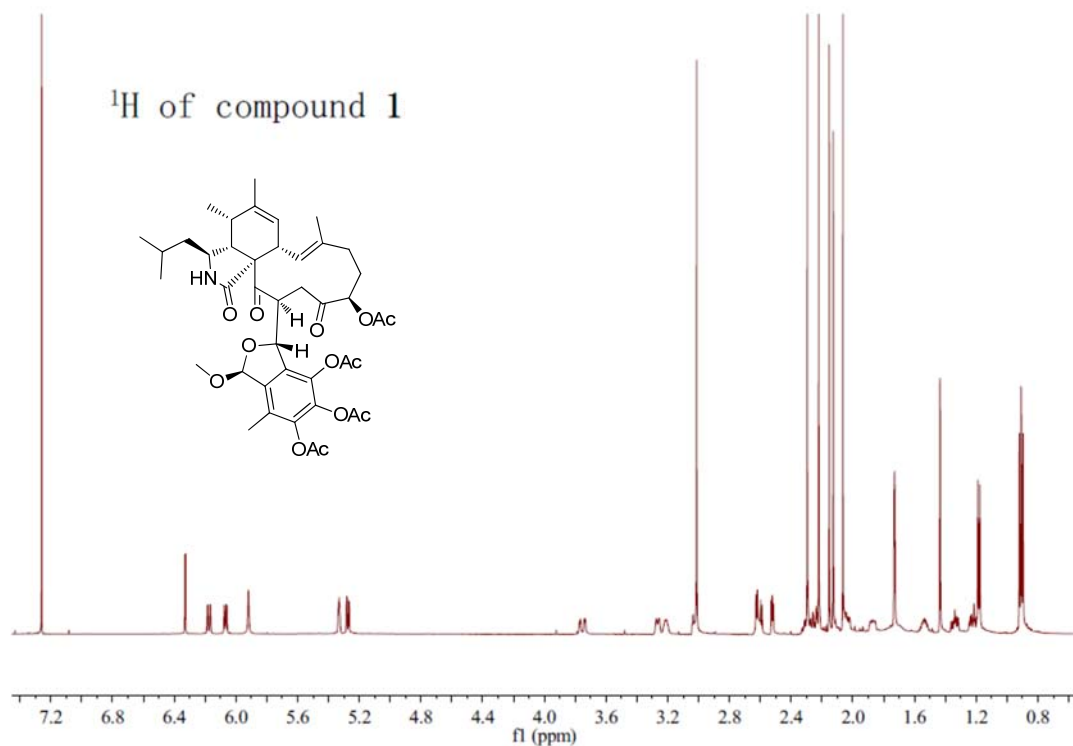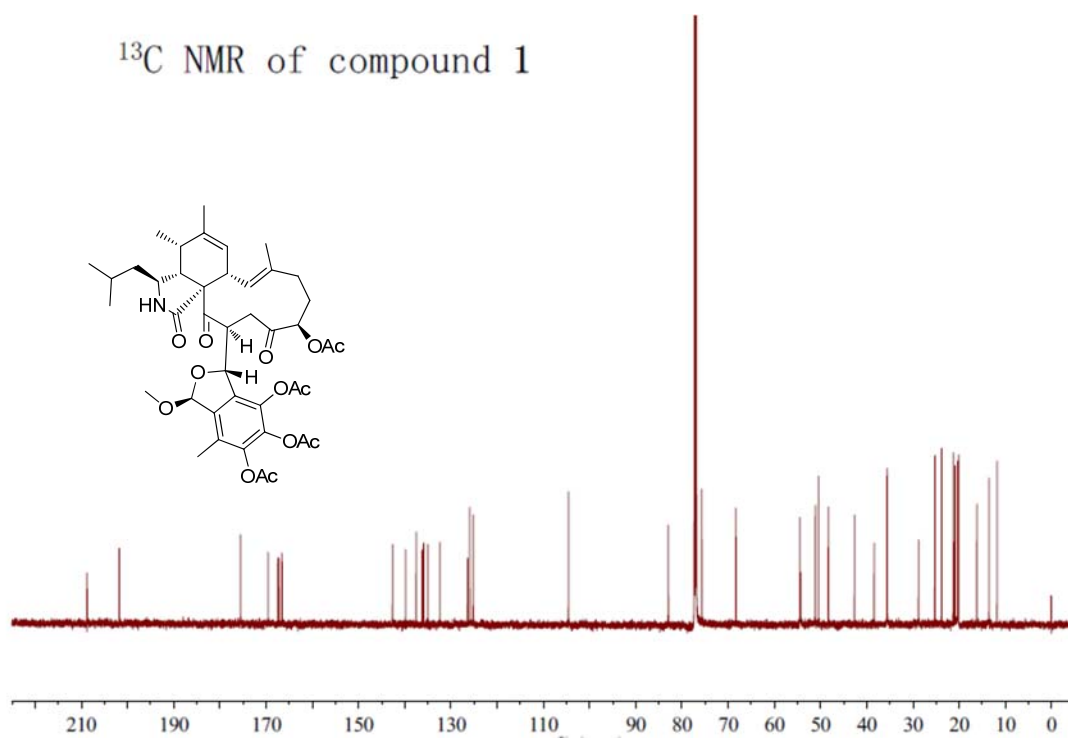

$^1\text{H}$ - $^1\text{H}$  COSY of compound 1

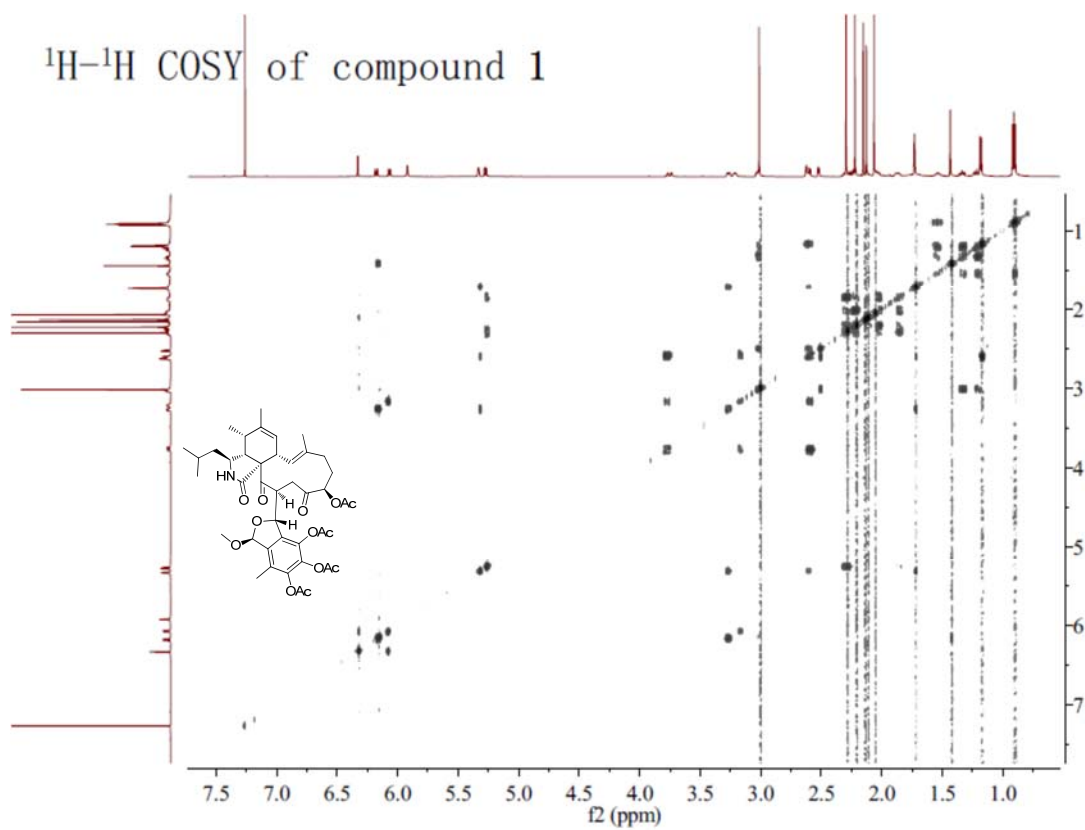

HMQC of compound 1

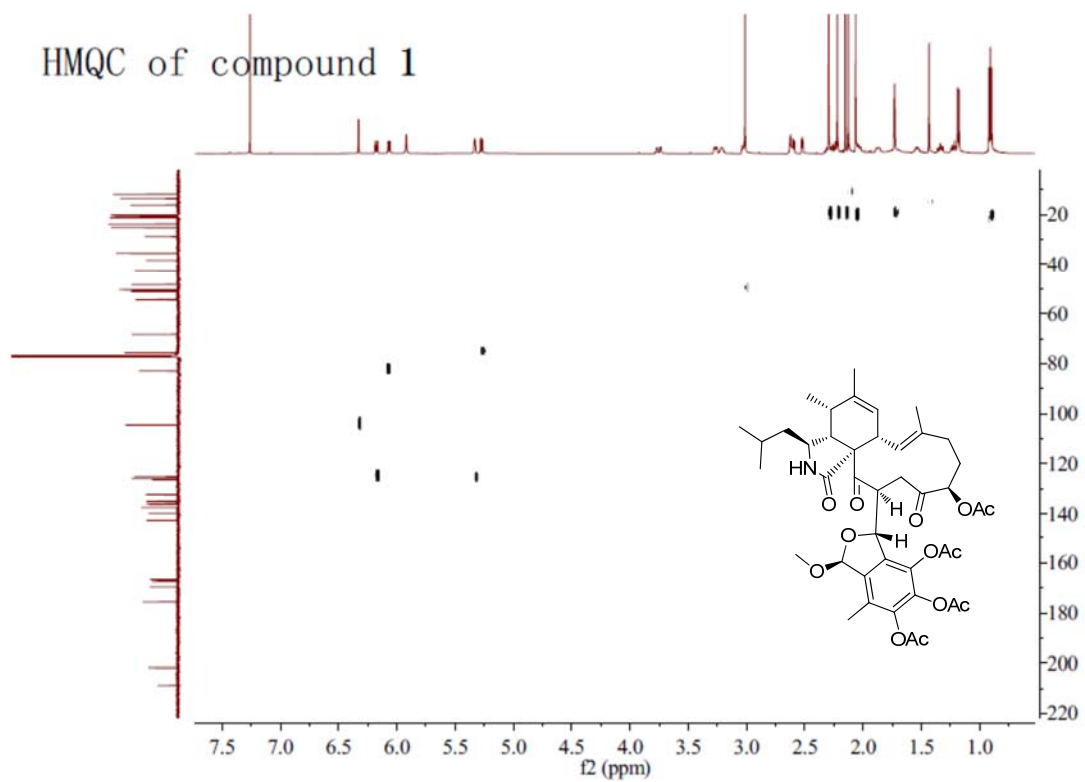

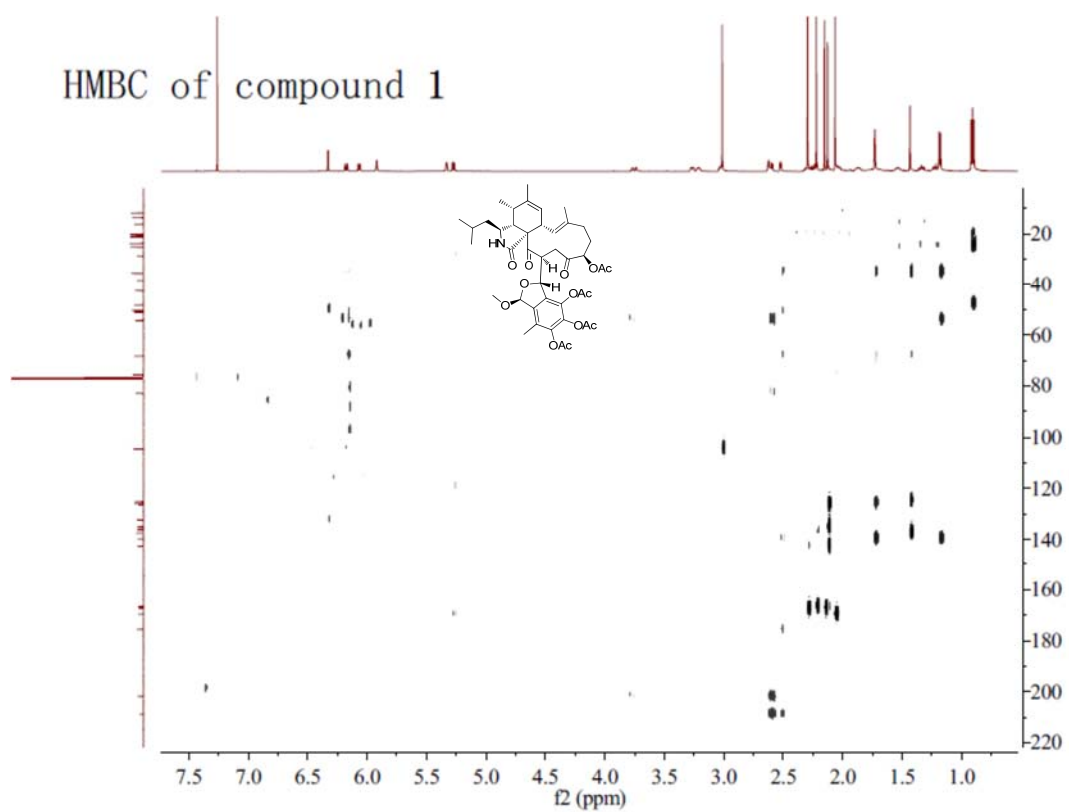

Figure S2. NMR spectra for compound 2

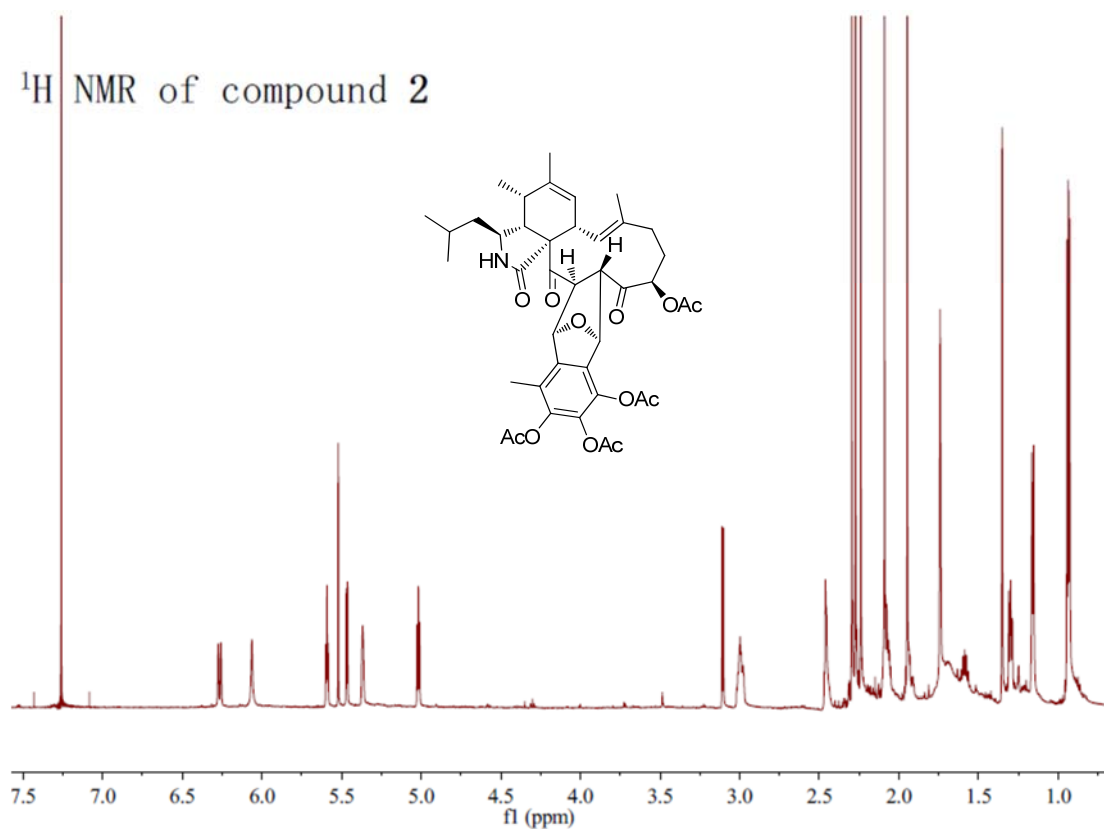

# <sup>13</sup>CNMR of compound 2

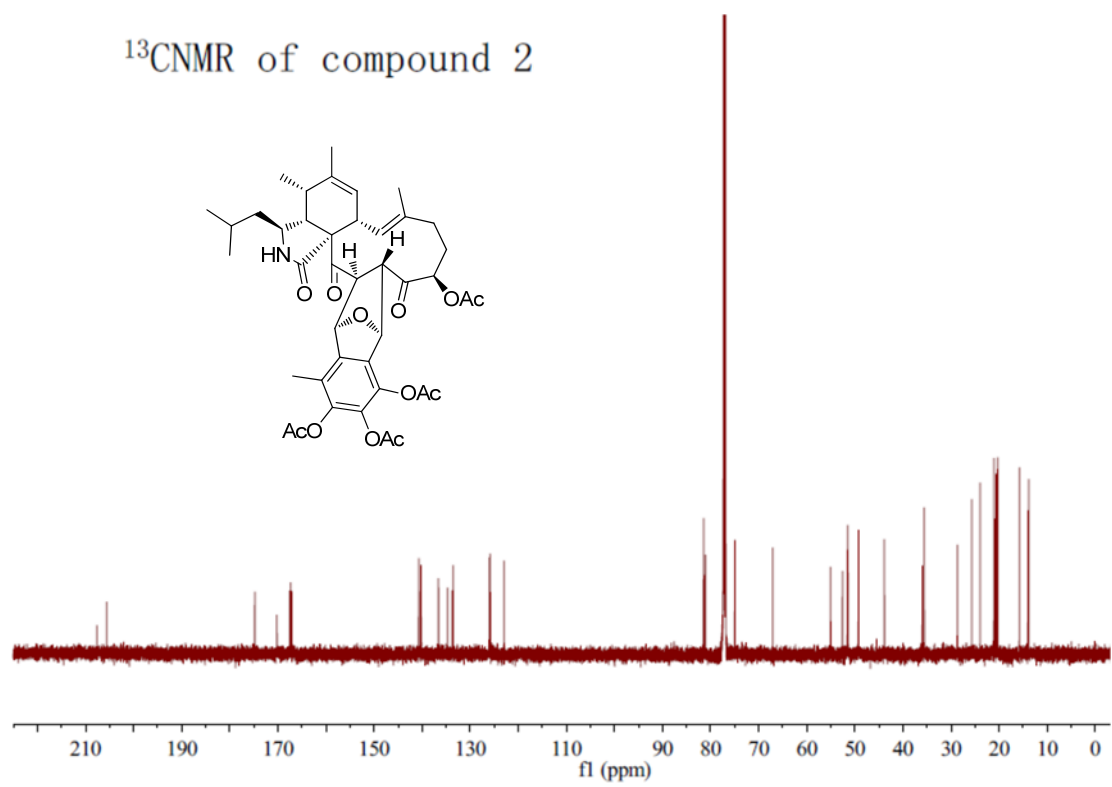

# <sup>1</sup>H-<sup>1</sup>H COSY of compound 2

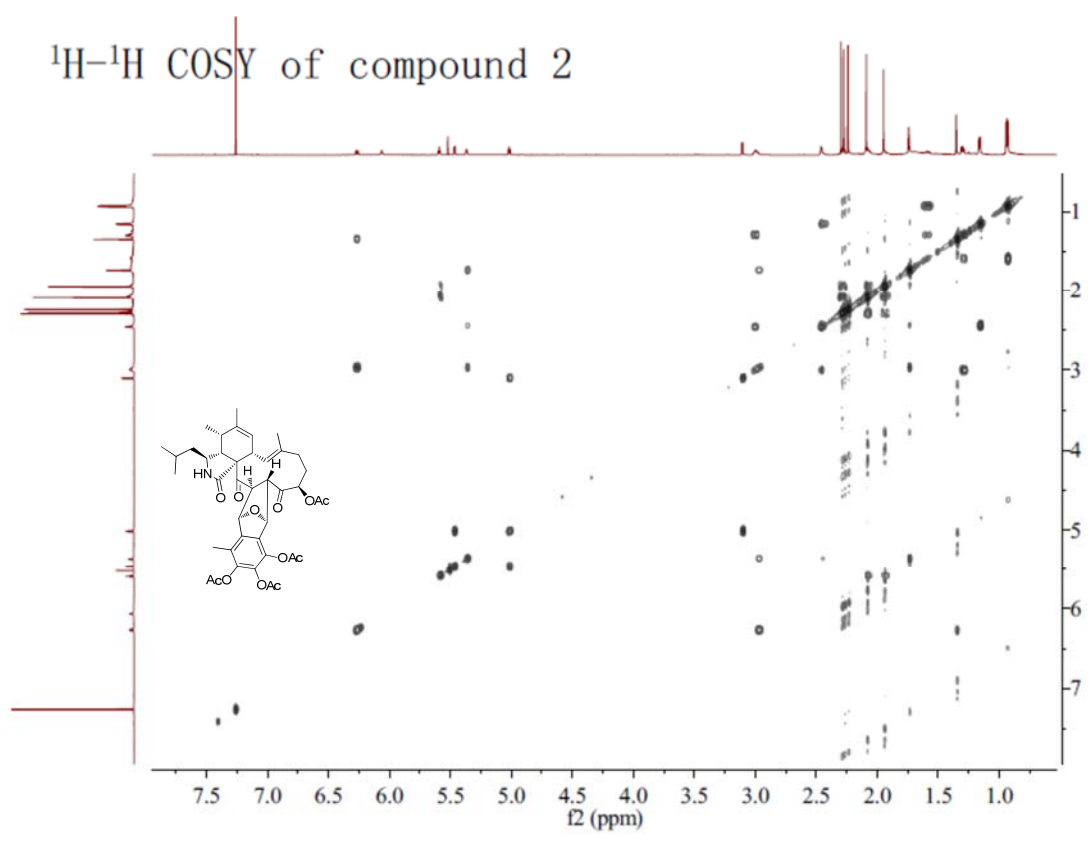

HMQC of compound 2

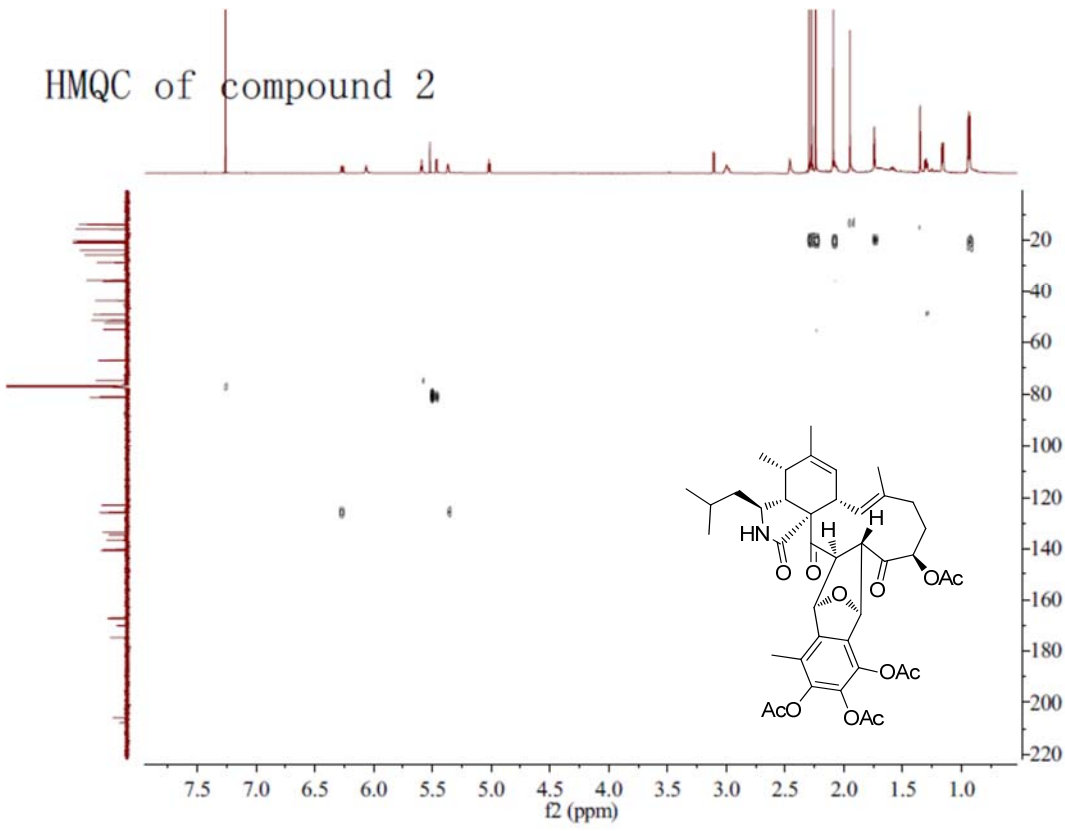

HMBC of compound 2

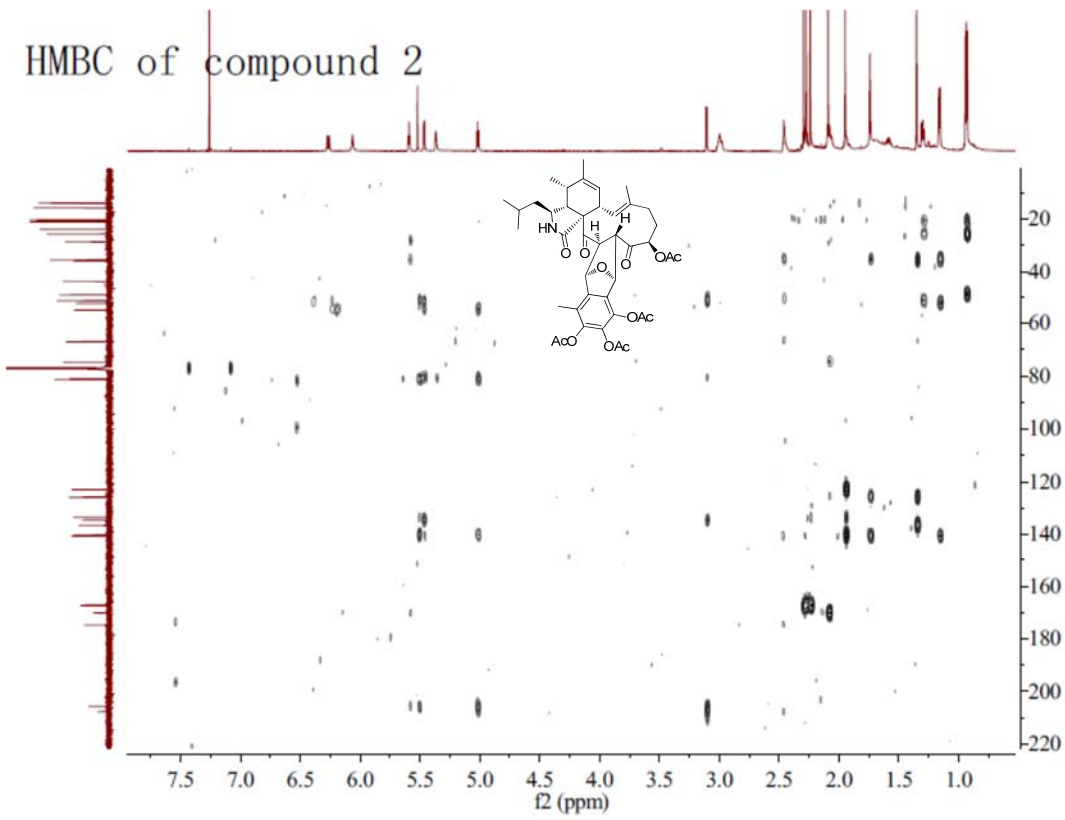

Figure S3. NMR spectra for compound 3.

$^1\text{H}$  NMR of compound 3

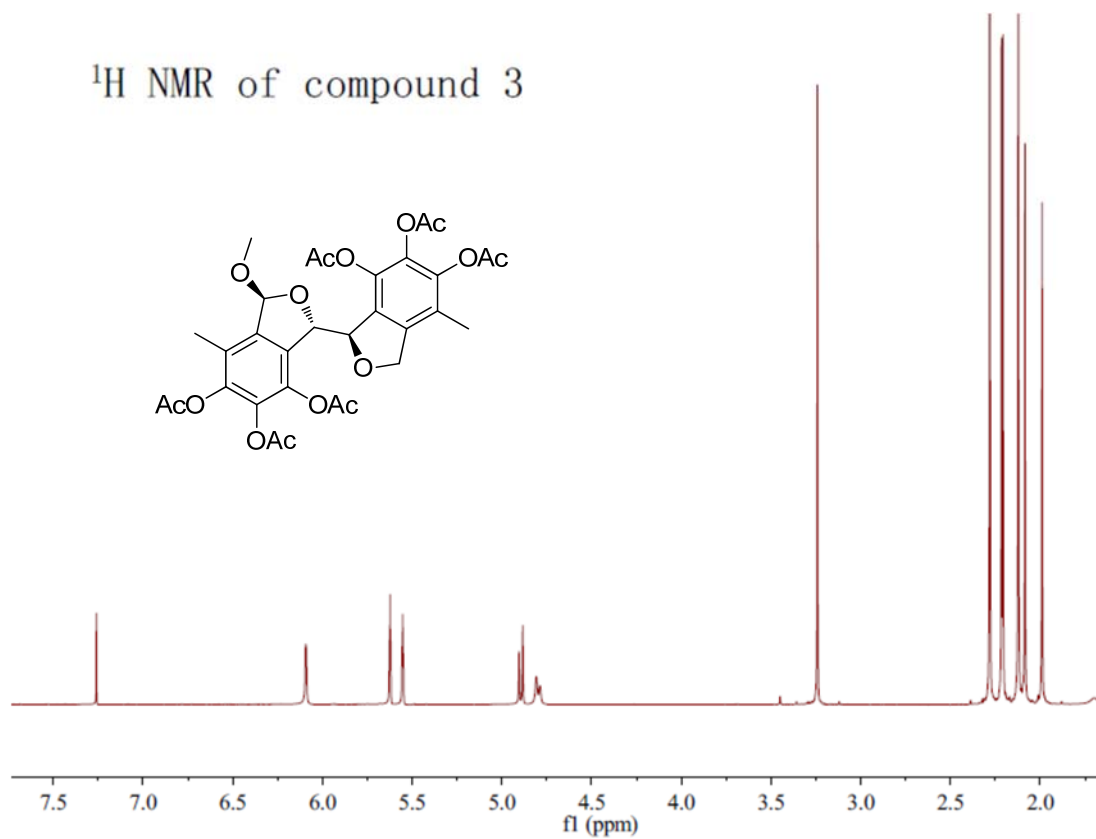

$^{13}\text{C}$  NMR of compound 3

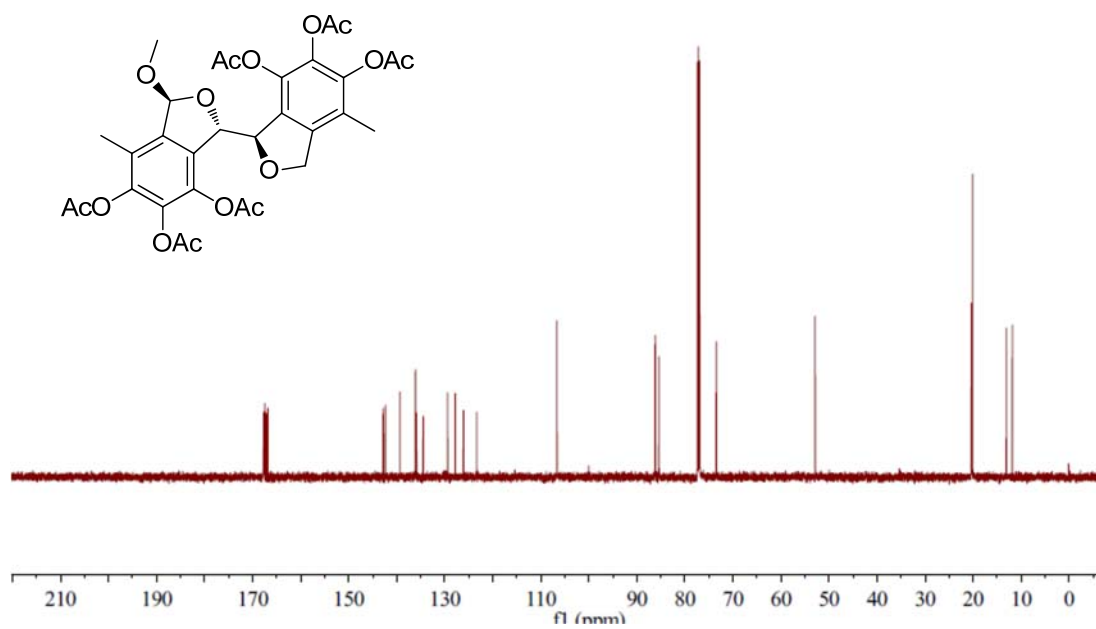



$^1\text{H}$ - $^1\text{H}$  COSY of compound

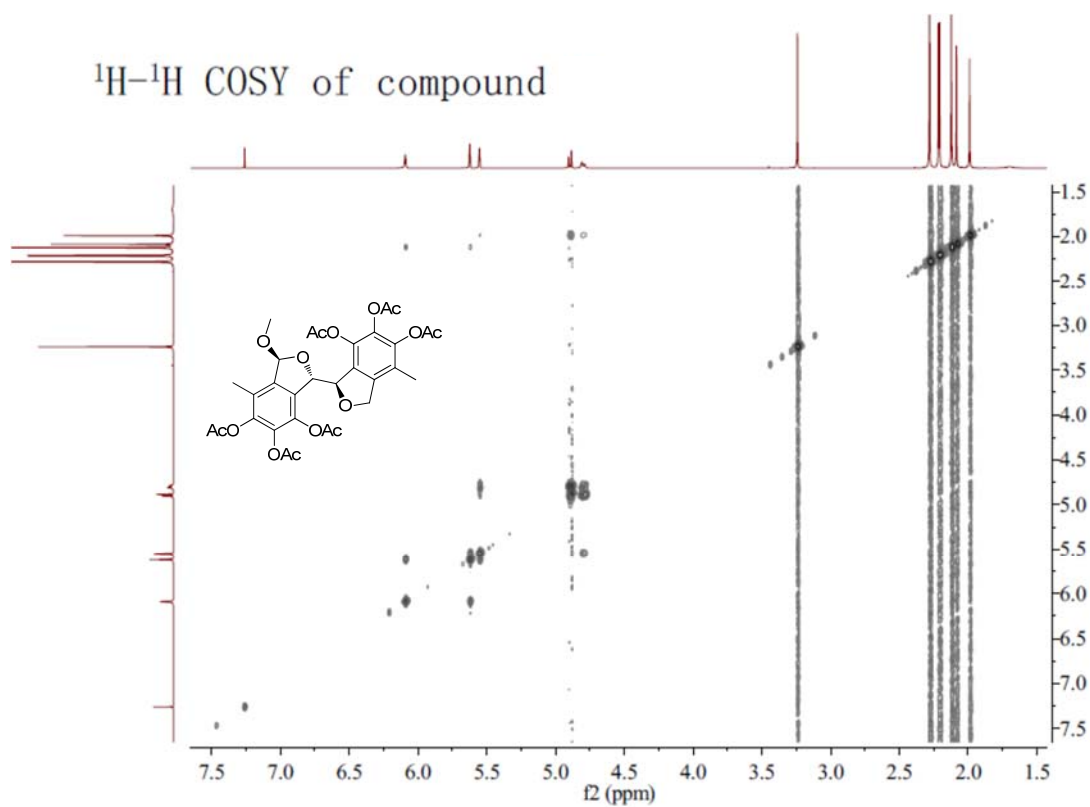

HMQC of compound 3

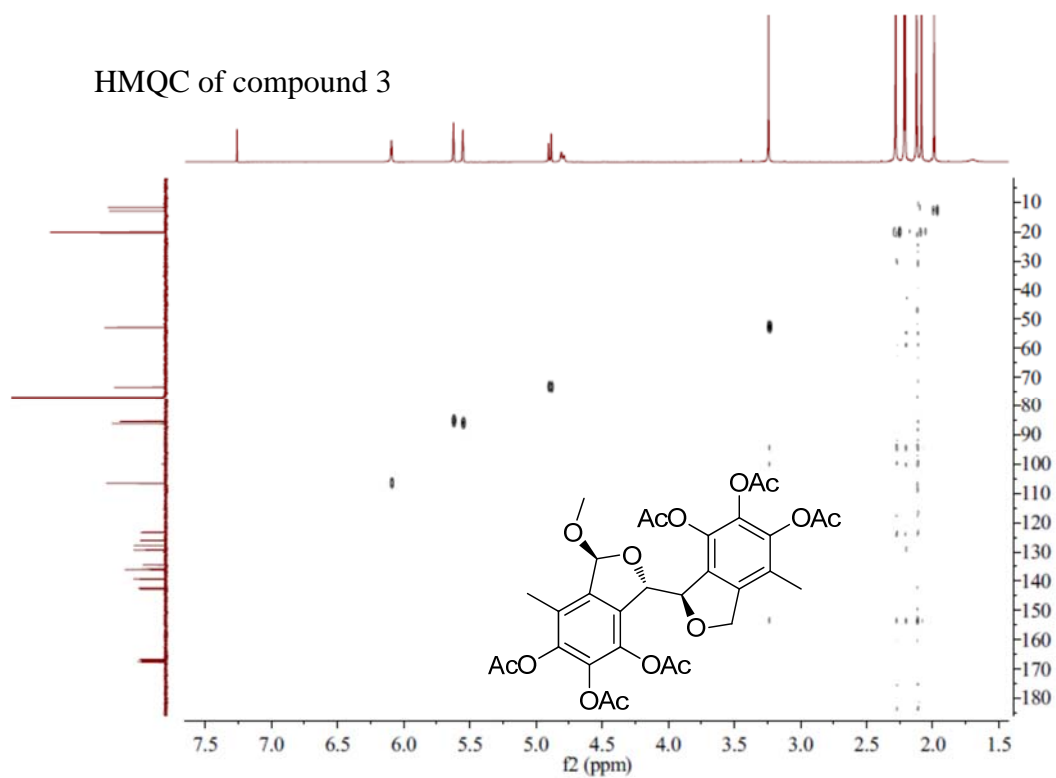

### HMBC of compound 3

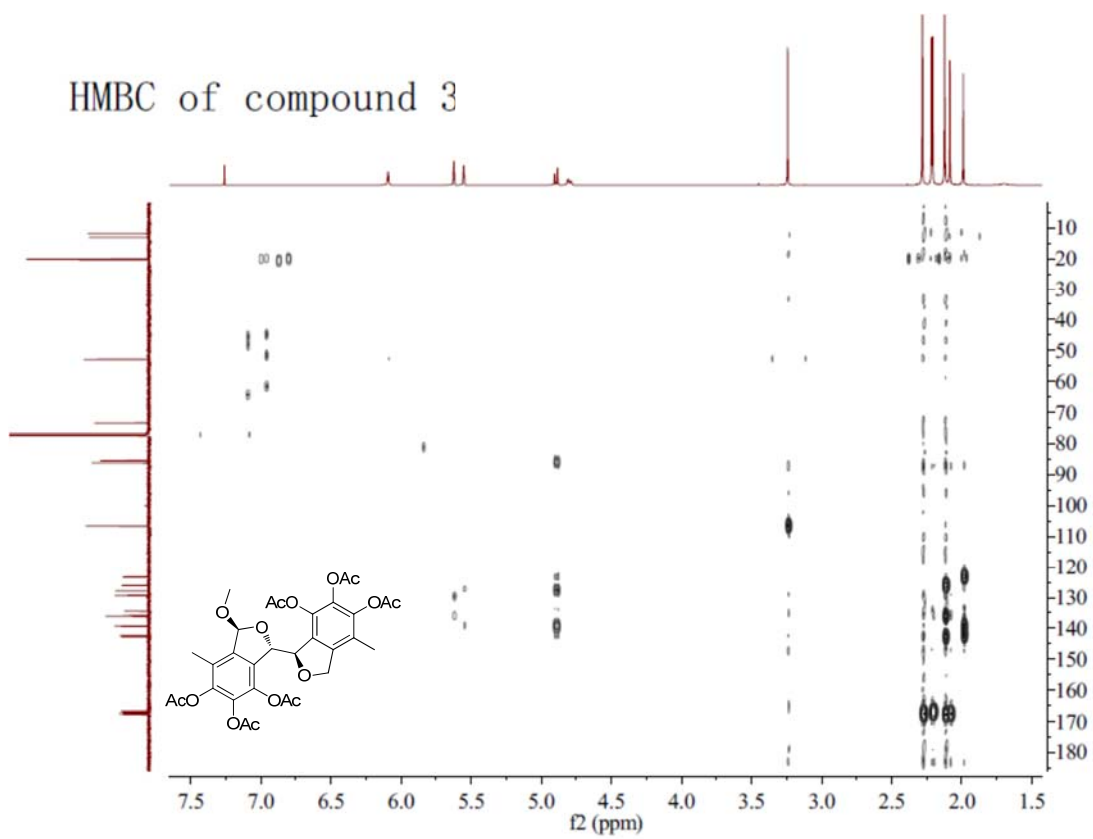

### $^1\text{H}$ - $^1\text{H}$ NOESY of compound 3

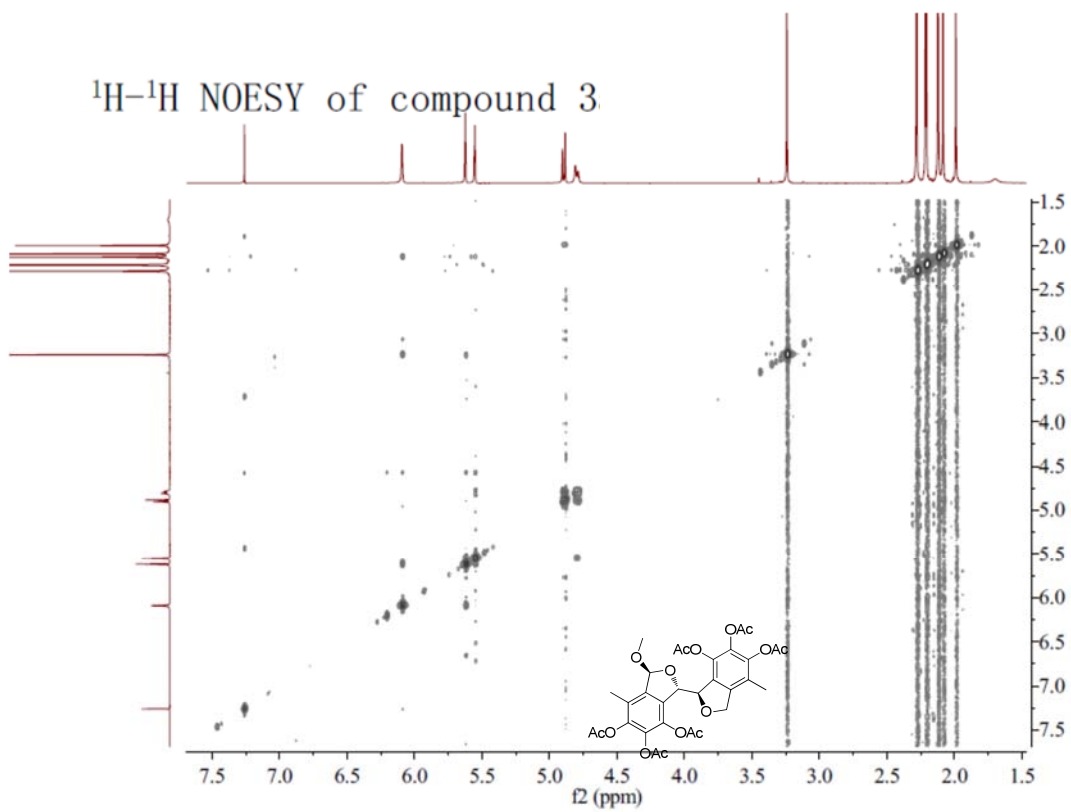

Figure S4. NMR spectra for compound 4.

$^1\text{H}$  NMR of compound 4

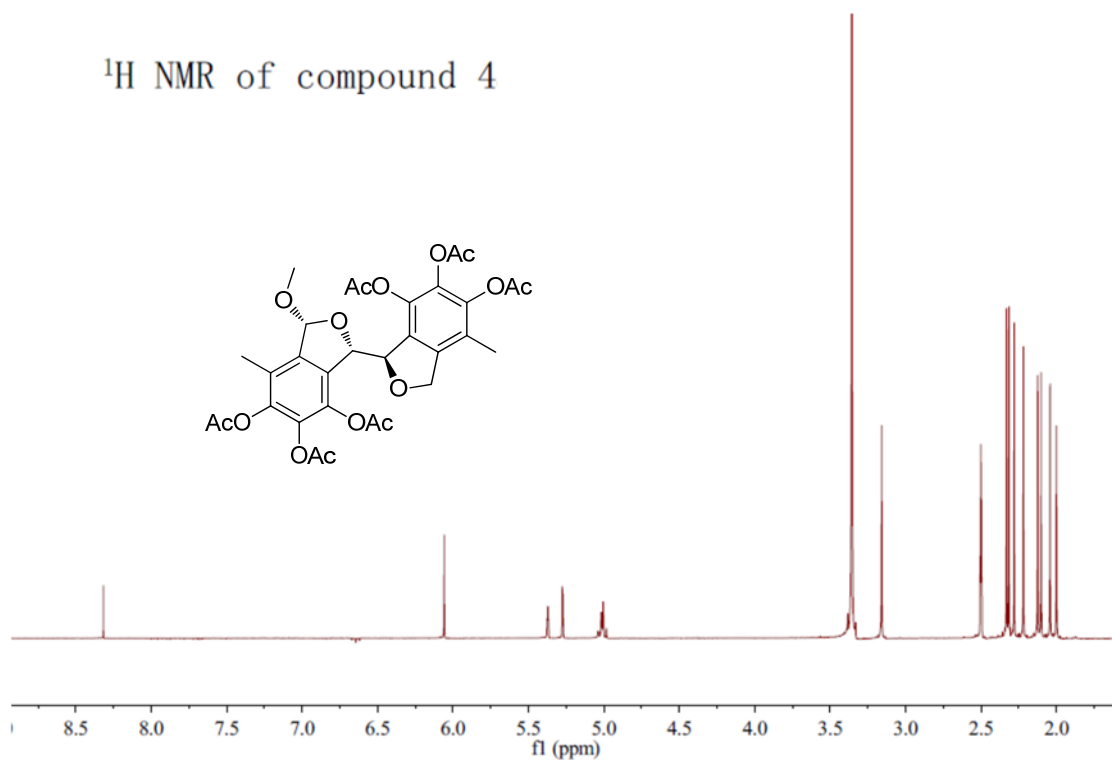

$^{13}\text{C}$  NMR of compound 4

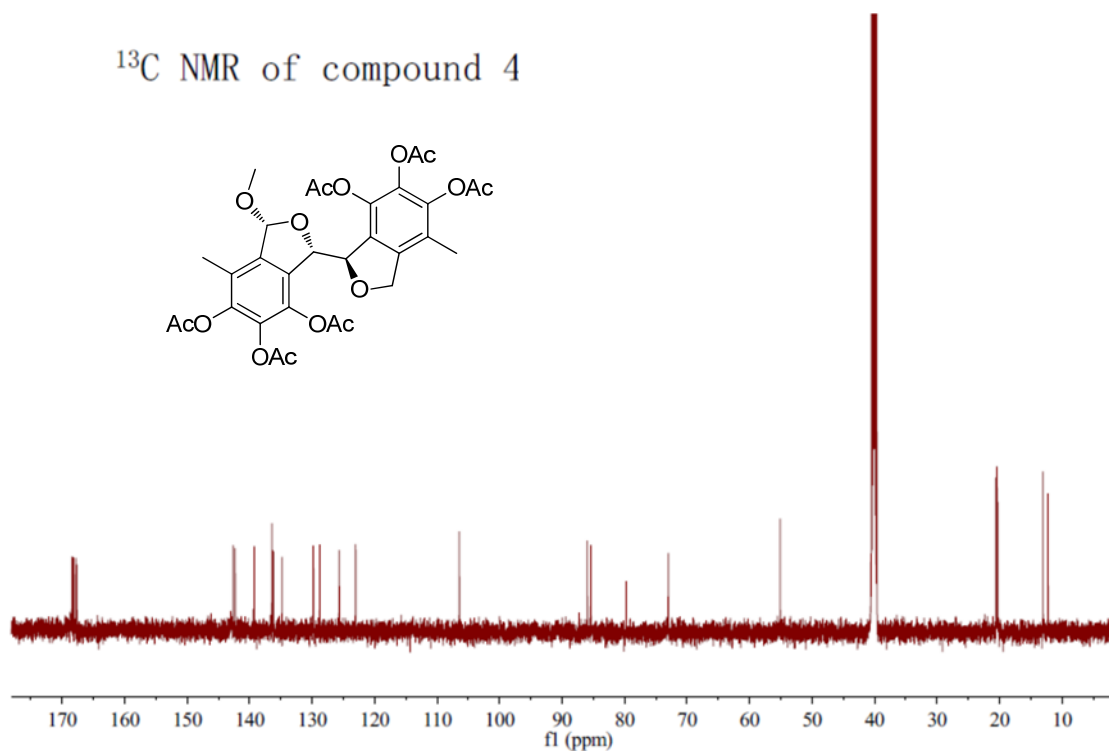

Supplement: c5ra01923k1.pdf [file c5ra01923k1.pdf]
